# Supplementary material
Source: Springer Nature journal article supplement (https://www.springermedizin.de/resource/supplementary/12885_2014_5151_MOESM1_ESM.pdf/9468546)

**Additional Figure 1. Results of sensitivity analysis based on leave-one-out approach**

A: Progression-free survival (PFS) and CTCs detection; B: overall survival (OS) and CTCs detection.

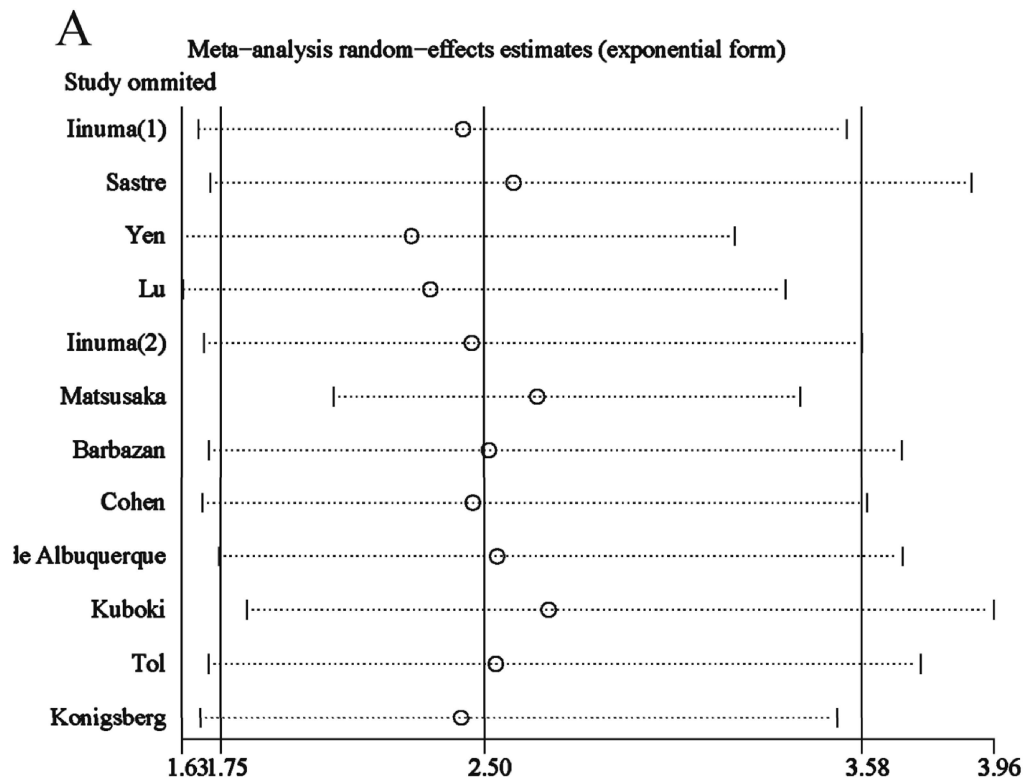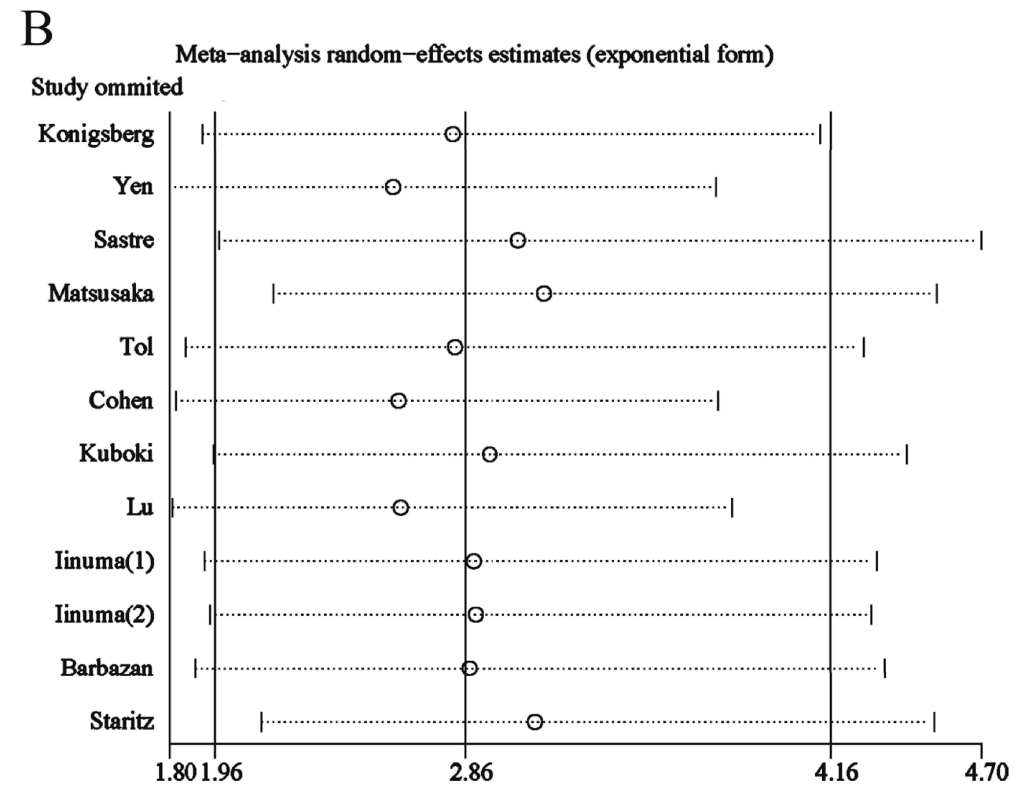

Supplement: MOESM1 [file 9468546]
